# Supplementary material for: Supported Nanostructured MoxC Materials for the Catalytic Reduction of CO2 through the Reverse Water Gas Shift Reaction
Source: MDPI journal article supplement (doi:10.3390/nano12183165), 2022-09-13
Supplement: s1 [file s1]

## SUPPLEMENTARY INFORMATION

### Supported Nanostructured Mo<sub>x</sub>C Materials for the Catalytic Reduction of CO<sub>2</sub> through the Reverse Water Gas Shift Reaction

Arturo Pajares <sup>1,2,†</sup>, Xianyun Liu <sup>1,‡</sup>, Joan R. Busacker <sup>1</sup>, Pilar Ramírez de la Piscina <sup>1</sup> and Narcís Homs <sup>1,2,\*</sup>

<sup>1</sup> Departament de Química Inorgànica i Orgànica, Secció de Química Inorgànica & Institut de Nanociència i Nanotecnologia (IN2UB), Universitat de Barcelona, Martí i Franquès 1, 08028 Barcelona, Spain

<sup>2</sup> Catalonia Institute for Energy Research (IREC), Jardins de les Dones de Negre 1, 08930 Barcelona, Spain

\* Correspondence: nhoms@irec.cat or narcis.homs@qi.ub.edu

† Present address: Sustainable Materials Management, Flemish Institute for Technological Research (VITO NV), Boeretang 200, 2400 Mol, Belgium.

‡ Present address: College of Chemistry and Chemical Engineering, Henan Polytechnic University, Jiaozuo 454003, China.

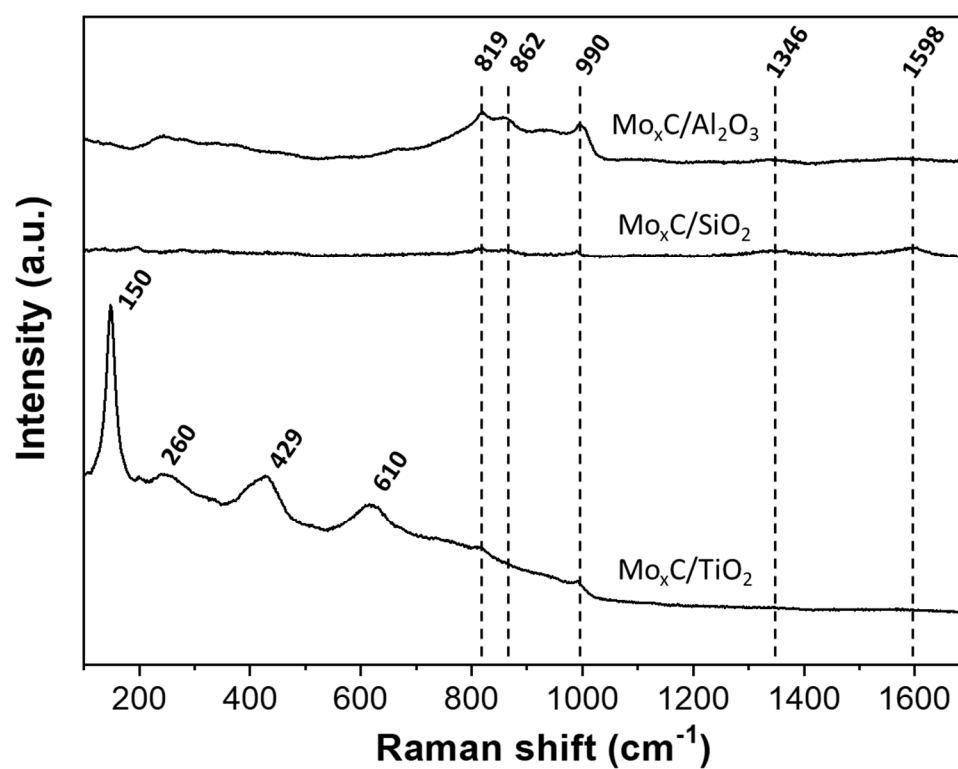

**Figure S1.** Raman spectra of fresh  $\text{Mo}_x\text{C}/\text{support}$  catalysts.

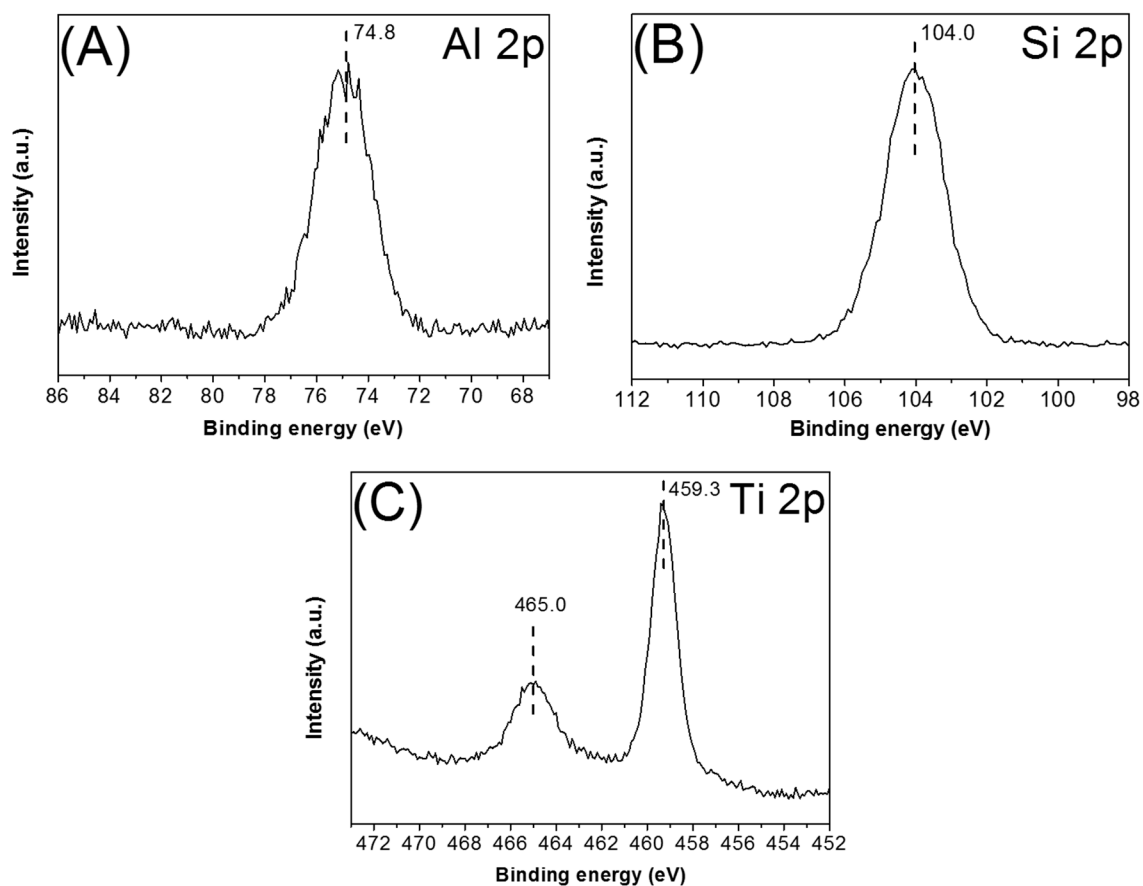

**Figure S2.** XPS spectra of  $\text{Mo}_x\text{C}/\text{support}$  catalysts. (A) Al 2p level registered for  $\text{Mo}_x\text{C}/\text{Al}_2\text{O}_3$ , (B) Si 2p level registered for  $\text{Mo}_x\text{C}/\text{SiO}_2$ , (C) Ti 2p level registered for  $\text{Mo}_x\text{C}/\text{TiO}_2$ .

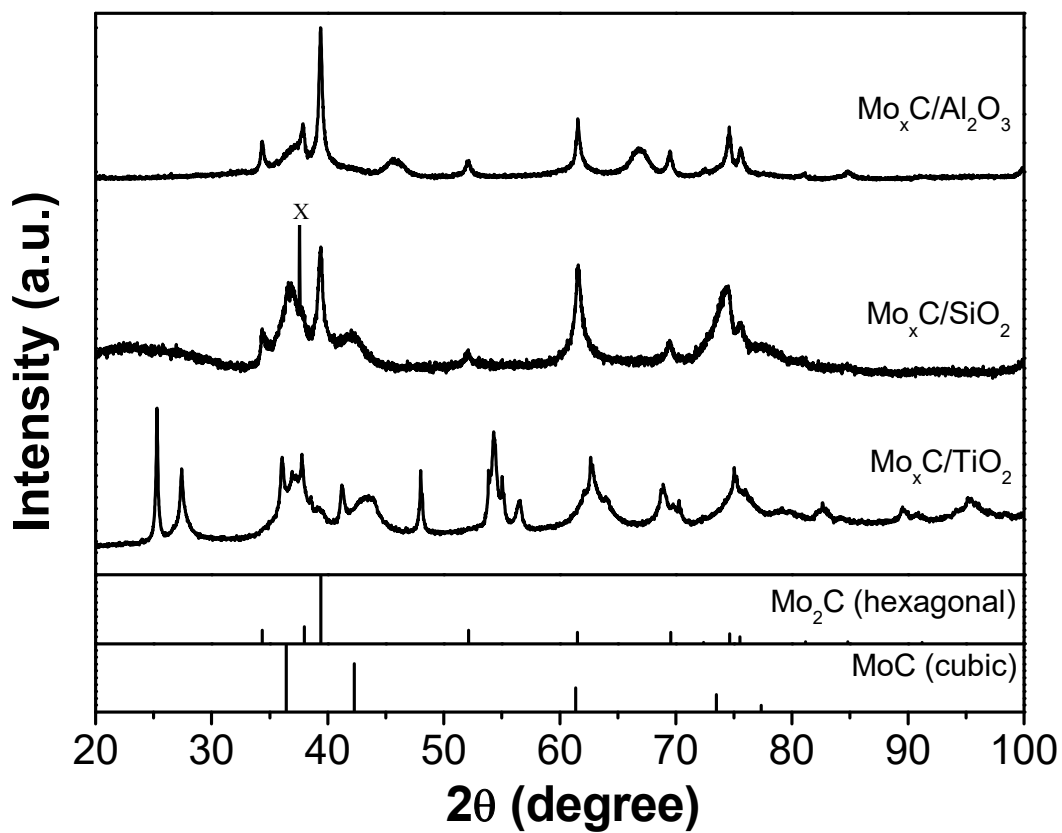

**Figure S3.** XRD patterns of  $\text{Mo}_x\text{C}/\text{support}$  catalysts after RWGS reaction ( $\text{CO}_2/\text{H}_2=1/3$ ); reaction conditions:  $m_{\text{cat}}=150$  mg,  $\text{GHSV}=3000$   $\text{h}^{-1}$ ,  $P=0.1$  MPa. X: signal due to SiC from catalytic bed.

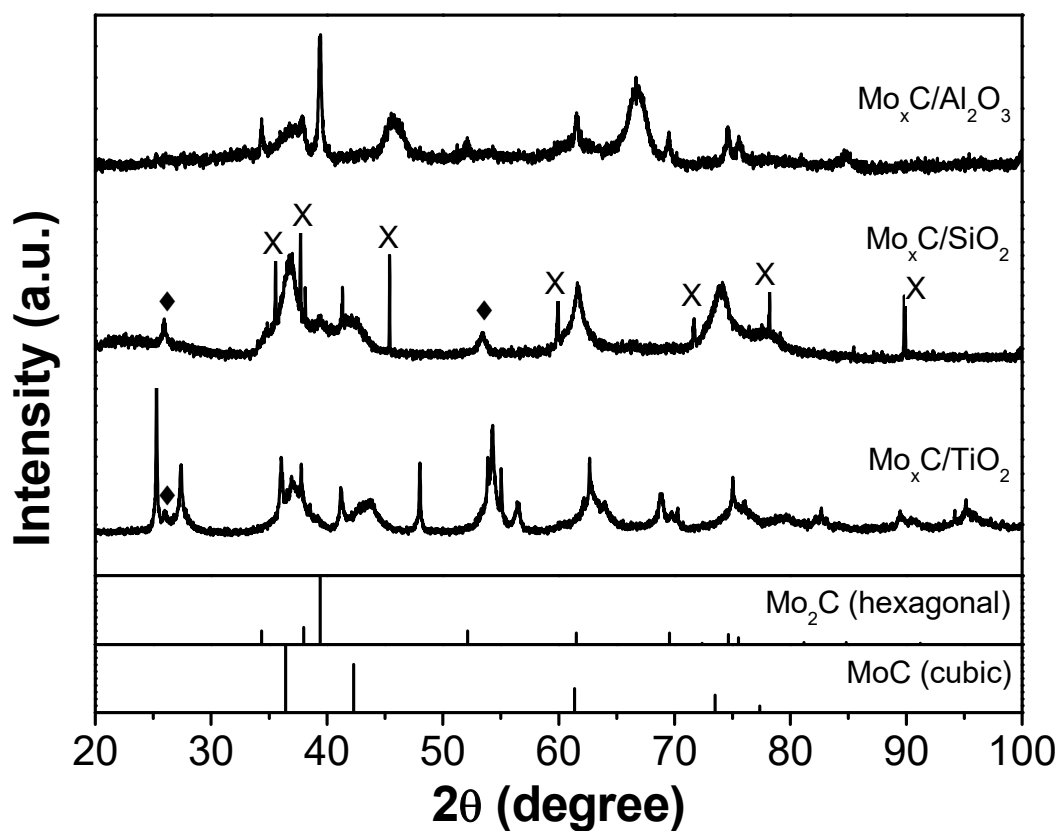

**Figure S4.** XRD patterns of  $\text{Mo}_x\text{C}/\text{support}$  catalysts after RWGS reaction ( $\text{CO}_2/\text{H}_2=1/1$ ); reaction conditions:  $m_{\text{cat}}=150$  mg,  $\text{GHSV}=3000$   $\text{h}^{-1}$ ,  $P=0.1$  MPa.

$\diamond$ :  $\text{MoO}_2$ ; X: signal due to SiC from catalytic bed.
